# Supplementary material for: Unveiling the thickness-dependent mechanical properties of graphene papers by in situ SEM tension
Source: Royal Society of Chemistry journal article supplement (doi:10.1039/c8ra09818b), 2019-01-01
Supplement: c8ra09818b2.pdf [file c8ra09818b2.pdf]

Supporting Information for

**Unveiling the thickness-dependent mechanical  
properties of graphene papers by *in-situ* SEM tension**

Tianci Cao, Xianqiang Liu,<sup>\*</sup> Xiaopeng Cheng, Yonghe Li, Lijun Sang,  
Jinyao Ma, Jin Wang, Jiachuo He, Mingming Wang, Yuefei Zhang<sup>\*</sup>

Institute of Microstructure and Property of Advanced Materials, Beijing University of Technology,  
Beijing, 100124, PR China

<sup>\*</sup> Corresponding Author: xqliu@bjut.edu.cn (Xianqiang Liu) and yfzhang@bjut.edu.cn (Yuefei Zhang)

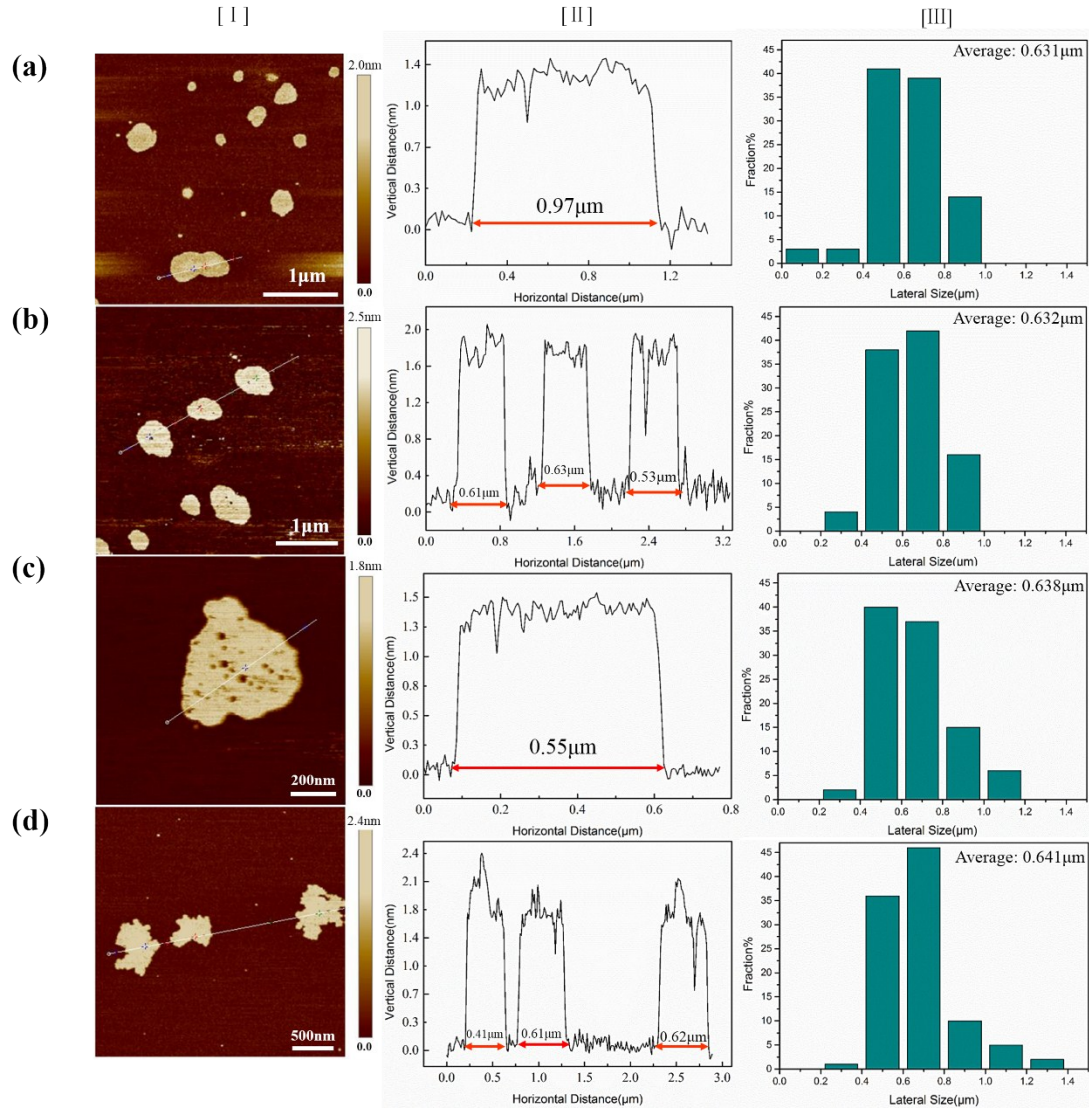

**Fig. S1** AFM results of the graphene sheets on mica showing morphologies [ I ], lateral sizes of single graphene sheet [ II ], and a histogram for statistics of lateral sizes [III] at preparation condition: 0.1 mol/L (M)  $K_2SO_4$  (a), 0.2 M (b), 0.3 M (c), 0.4 M (d).
